# Supplementary material for: A qualitative assessment of factors affecting nursing home caregiving staff experiences during the COVID-19 pandemic
Source: PubMed Central journal article supplement (PMC8592470; doi:10.1371/journal.pone.0260055), 2021-11-15

S1\_Figure.

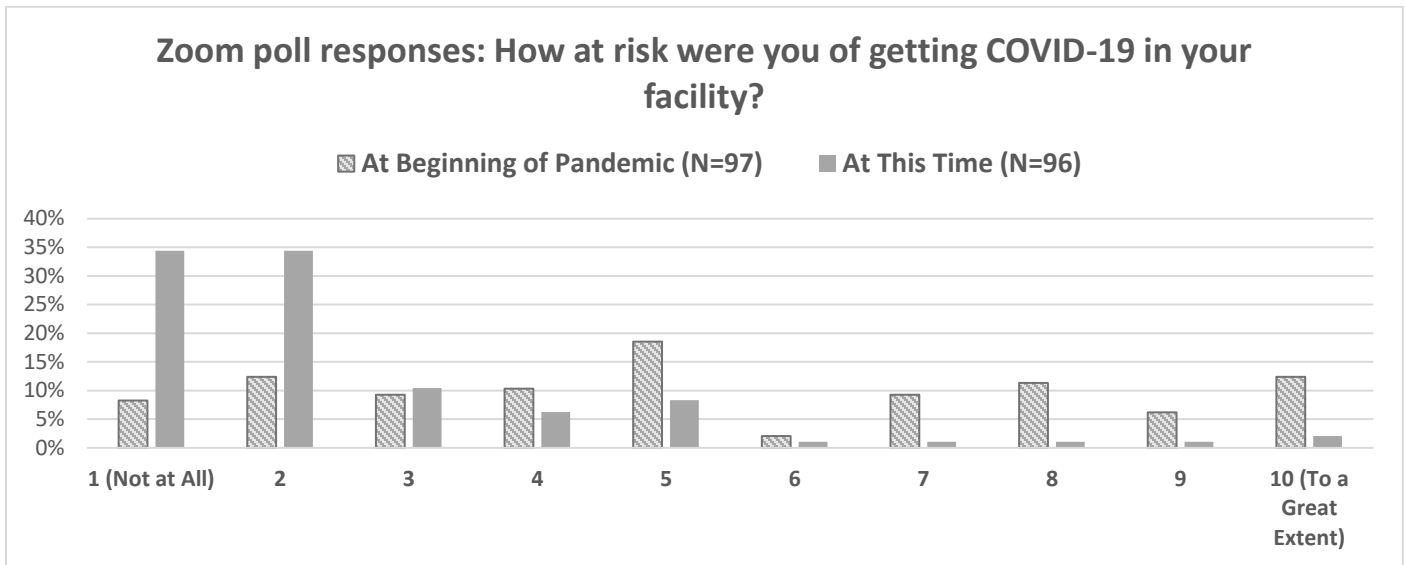

Supplement: pone.0260055.s001.pdf [file pone.0260055.s001.pdf]
